# Supplementary material for: Real-World Cost-Effectiveness: Lower Cost of Treating Patients to Glycemic Goal with Liraglutide versus Exenatide
Source: PubMed Central journal article supplement — Adv Ther. 2014 Jan 30;31(2):202–16. doi: 10.1007/s12325-014-0098-8 (PMC3930836; doi:10.1007/s12325-014-0098-8), 2014-01-30
Supplement: 12325_2014_98_MOESM1_ESM.pdf [file 12325_2014_98_MOESM1_ESM.pdf]

- A retrospective cohort study was conducted of adult patients with type 2 diabetes treated with liraglutide (LIRA) once daily or exenatide (EXEN) twice daily to compare diabetes-related pharmacy costs related to glycemic goal attainment using integrated medical and pharmacy claims data.
- In this study, predicted diabetes-related pharmacy costs per patient over 6 months' follow-up were higher with LIRA than with EXEN (\$2,002 vs. \$1,799,  $P < 0.001$ ).
- However, as a greater proportion of patients on LIRA achieved glycated hemoglobin A1C (A1C) goal  $< 7\%$  compared with patients on EXEN (64.4% vs. 53.6%,  $P < 0.05$ ), diabetes-related pharmacy costs for each successfully treated patient were lower with LIRA than with EXEN (\$3,108 vs. \$3,354;  $P < 0.0001$ ).
- These findings may assist clinicians and formulary decision makers in choosing the most cost effective glucagon-like peptide 1 (GLP-1) receptor agonists and improve patient outcomes.

This summary slide represents the opinions of the authors. Sponsorship for this study was funded by Novo Nordisk Inc. (NJ, USA). Medical writing assistance for this study was provided by MedVal Scientific Information Services, LLC. For a full list of acknowledgments and conflicts of interest for all authors of this article, please see the full text online. Copyright © The Authors 2014 . Creative Commons Attribution Noncommercial License (CC BY-NC).
